# Supplementary material for: The disintegrin/metalloproteinase Adam10 is essential for epidermal integrity and Notch-mediated signaling
Source: Oxford University Press journal article supplement (doi:10.1242/dev.055210), 2011-01-04
Supplement: dev055210tables1.pdf [file dev055210tables1.pdf]

**Table S1. Gene analysis**

| <b>A Regulated genes from <i>ADAM10<sup>Flox/Flox</sup> Cre</i> mice known to be involved in lipid metabolism</b>   |                                |
|---------------------------------------------------------------------------------------------------------------------|--------------------------------|
| Gene name                                                                                                           | Fold change in gene expression |
| Aldo-ketoreductase family 1, member D1                                                                              | -3.98                          |
| Carbonic anhydrase 6                                                                                                | -3.73                          |
| Arachidonate 12-lipoxygenase                                                                                        | -3.61                          |
| Butyrobetaine (gamma), 2-oxoglutarate dioxygenase 1                                                                 | -3.39                          |
| Stearoyl-Coenzyme A desaturase 1                                                                                    | -2.39                          |
| Enoyl Coenzyme A hydratase domain containing 1                                                                      | -2.39                          |
| Arachidonate lipoxygenase, epidermal                                                                                | -2.32                          |
| STAR-related lipid transfer (START) domain containing 5                                                             | -2.29                          |
| Stearoyl-Coenzyme A desaturase 2                                                                                    | -2.27                          |
| Acyl-CoA synthetase long-chain family member 4                                                                      | -2.18                          |
| Short chain dehydrogenase                                                                                           | -2.17                          |
| Alkaline ceramidase 1                                                                                               | -2.05                          |
| Acyl-Coenzyme A dehydrogenase family, member 9                                                                      | -1.88                          |
| Fatty acid binding protein 5, epidermal                                                                             | -1.63                          |
| Alkaline ceramidase 2                                                                                               | -1.62                          |
| Fattyacidbindingprotein 5, epidermal                                                                                | -1.6                           |
| <b>B Regulated genes from <i>ADAM10<sup>Flox/Flox</sup> Cre</i> mice known to be involved in retinol metabolism</b> |                                |
| Gene name                                                                                                           | Fold change in gene expression |
| Aldehyde dehydrogenase family 1, subfamily A7                                                                       | -7.73                          |
| Lysozyme 2                                                                                                          | -4.61                          |
| Abhydrolase domain containing 14b                                                                                   | -4.19                          |
| Arachidonate 12-lipoxygenase                                                                                        | -3.61                          |
| Glycine amidinotransferase                                                                                          | -3.14                          |
| Cytochrome b5 reductase 4                                                                                           | -2.58                          |
| Cytochrome b5 reductase 4                                                                                           | -2.5                           |
| Retinol dehydrogenase 12                                                                                            | -2.36                          |
| Alcohol dehydrogenase 1 (class I)                                                                                   | -2.32                          |
| Lysosomal-associated protein transmembrane 5                                                                        | -2.18                          |
| Acyl-CoA synthetase long-chain family member 1                                                                      | -2.02                          |
| Cytochrome P450, family 2, subfamily s, polypeptide 1                                                               | -1.99                          |
| Short chain dehydrogenase                                                                                           | -1.88                          |
| Aldehyde dehydrogenase 3 family, member B2                                                                          | -1.63                          |
| Retinol binding protein 2, cellular                                                                                 | -1.55                          |
